# Supplementary material for: Influence of Catheter–Incision Congruency in Epidural Analgesia on Postcesarean Pain Management: A Single-Blinded Randomized Controlled Trial
Source: MDPI journal article supplement (doi:10.3390/jpm11111099), 2021-10-27
Supplement: s1 [file s1]

## Supplemental Digital Content

**Table S1.** Proportions of participants with a VAS of >33 mm.

|                       | Low thoracic<br>PCEA<br>(N= 45) | Lumbar PCEA<br>(N= 49) | Low thoracic<br>morphine<br>(N= 49) | Lumbar mor-<br>phine<br>(N= 46) | p value   |
|-----------------------|---------------------------------|------------------------|-------------------------------------|---------------------------------|-----------|
| T <sub>1</sub> (n; %) |                                 |                        |                                     |                                 |           |
| Static pain           |                                 |                        |                                     |                                 |           |
| VAS = 0               | 12 (26.7%) <sup>#</sup>         | 2 (4.1%)*              | 4 (8.2%)*                           | 0 (0%)*                         | p < 0.001 |
| VAS > 33 mm           | 7 (15.6%) <sup>#</sup>          | 23 (46.9%)*            | 18 (36.7%)*                         | 25 (54.3%)*                     | p < 0.001 |
| Dynamic pain          |                                 |                        |                                     |                                 |           |
| VAS = 0               | 7 (15.6%) <sup>#</sup>          | 2 (4.1%)*              | 3 (6.1%)                            | 0 (0%)*                         | p = 0.019 |
| VAS > 3.3             | 13 (28.8%) <sup>#</sup>         | 34 (69.4%)*            | 33 (67.3%)*                         | 34 (73.9%)*                     | p < 0.001 |
| Uterine cramp         |                                 |                        |                                     |                                 |           |
| VAS = 0               | 10 (22.2%) <sup>#</sup>         | 0 (0%)*                | 0 (0%)*                             | 3 (6.5%)*                       | p < 0.001 |
| VAS > 33 mm           | 18 (40.0%) <sup>#</sup>         | 30 (61.2%)*            | 37 (75.5%)*                         | 32 (69.6%)*                     | p = 0.003 |
| T <sub>2</sub> (n; %) |                                 |                        |                                     |                                 |           |
| Static VAS            |                                 |                        |                                     |                                 |           |
| VAS = 0               | 7 (15.6%)                       | 3 (6.1%)               | 2 (4.1%)                            | 2 (4.3%)                        | p = 0.119 |
| VAS > 33 mm           | 4 (8.9%)                        | 13 (26.5%)             | 12 (24.5%)                          | 10 (21.7%)                      | p = 0.152 |
| Dynamic VAS           |                                 |                        |                                     |                                 |           |
| VAS = 0               | 2 (4.4%)                        | 0 (0%)                 | 0 (0%)                              | 0 (0%)                          | p = 0.092 |
| VAS > 33 mm           | 16 (35.6%) <sup>#</sup>         | 29 (59.2%)*            | 30 (61.2%)*                         | 28 (60.7%)*                     | p = 0.036 |
| Uterine cramp VAS     |                                 |                        |                                     |                                 |           |
| VAS = 0               | 3 (6.7%)                        | 0 (0%)                 | 0 (0%)                              | 1 (2.2%)                        | p = 0.086 |
| VAS > 33 mm           | 18 (40.0%) <sup>#</sup>         | 32 (65.3%)*            | 22 (44.9%) <sup>#</sup>             | 16 (34.8%) <sup>#</sup>         | p = 0.016 |
| T <sub>3</sub> (N; %) |                                 |                        |                                     |                                 |           |
| Static pain           |                                 |                        |                                     |                                 |           |
| VAS = 0               | 10 (22.2%) <sup>#</sup>         | 1 (2.0%)*              | 5 (10.2%)*                          | 3 (6.5%)*                       | p = 0.010 |
| VAS > 33 mm           | 0 (0%)                          | 6 (12.2%)              | 6 (12.2%)                           | 2 (4.3%)                        | p = 0.057 |
| Dynamic pain          |                                 |                        |                                     |                                 |           |
| VAS = 0               | 1 (2.2%)                        | 0 (0%)                 | 0 (0%)                              | 1 (2.2%)                        | p = 0.539 |
| VAS > 33 mm           | 9 (20.0%) <sup>#</sup>          | 26 (57.8)*             | 19 (38.8%)                          | 22 (47.8%)*                     | p = 0.007 |
| Uterine cramp         |                                 |                        |                                     |                                 |           |
| VAS = 0               | 4 (8.9%)                        | 1 (2.0%)               | 0 (0%)                              | 2 (4.3%)                        | p = 0.128 |
| VAS > 33 mm           | 9 (20.0%) <sup>#</sup>          | 22 (44.9%)*            | 12 (24.5%) <sup>#</sup>             | 10 (21.7%) <sup>#</sup>         | p = 0.023 |
| T <sub>4</sub> (N; %) |                                 |                        |                                     |                                 |           |
| Static pain           |                                 |                        |                                     |                                 |           |
| VAS = 0               | 12 (26.7%)                      | 5 (10.2%)              | 12 (24.5%)                          | 9 (19.6%)                       | p = 0.188 |
| VAS > 33 mm           | 1 (2.2%)                        | 4 (8.2%)               | 3 (6.1%)                            | 1 (2.2%)                        | p = 0.431 |
| Dynamic pain          |                                 |                        |                                     |                                 |           |
| VAS = 0               | 1 (2.2%)                        | 1 (2.0%)               | 1 (2.0%)                            | 1 (2.2%)                        | p = 0.999 |
| VAS > 33 mm           | 9 (20.0%) <sup>&amp;</sup>      | 13 (26.5%)             | 20 (40.8%)*                         | 8 (17.4%) <sup>&amp;</sup>      | p = 0.045 |
| Uterine cramp         |                                 |                        |                                     |                                 |           |
| VAS = 0               | 3 (6.7%)                        | 2 (4.1%)               | 5 (10.2%)                           | 3 (6.5%)                        | p = 0.692 |
| VAS > 33 mm           | 10 (22.2%)                      | 10 (20.4%)             | 10 (20.4%)                          | 2 (4.3%)                        | p = 0.076 |

\* means a p value < 0.05 comparing to that of low thoracic PCEA group. <sup>#</sup> means a p value < 0.05 comparing to that of lumbar PCEA group. <sup>&</sup> means a p value < 0.05 comparing to that of low thoracic morphine group.
